# Supplementary material for: MPV reduction of ethyl levulinate to γ-valerolactone by the biomass-derived chitosan-supported Zr catalyst
Source: Royal Society of Chemistry journal article supplement (doi:10.1039/d0nj02667k), 2020-01-01
Supplement: d0nj02667k1.pdf [file d0nj02667k1.pdf]

*Electronic Supplementary Information (ESI)*

**MPV Reduction of Ethyl Levulinate to  $\gamma$ -Valerolactone by  
Biomass-derived Chitosan-Supported Zr Catalyst**

**Tianlong Wang, Hai Xu,\* Jianghua He\* Yuetao Zhang<sup>\*a</sup>**

*<sup>a</sup>State Key Laboratory of Supramolecular Structure and Materials, College of Chemistry, Jilin University, Changchun, Jilin, 130012, China.*

E-mail: [xuhai@jlu.edu.cn](mailto:xuhai@jlu.edu.cn); [hjh2015@jlu.edu.cn](mailto:hjh2015@jlu.edu.cn); [ytzhang2009@jlu.edu.cn](mailto:ytzhang2009@jlu.edu.cn)

Table S1 ICP detection of catalysts.

| Catalysts            | Chitosan-Zr | Recovered chitosan-Zr | Chitosan-Ru | Chitosan-Co | Chitosan-Ni | Chitosan-Hf | Chitin-Zr |
|----------------------|-------------|-----------------------|-------------|-------------|-------------|-------------|-----------|
| Metal content (wt %) | 6.0         | 5.7                   | 6.14        | 5.82        | 5.40        | 5.1         | 5.2       |

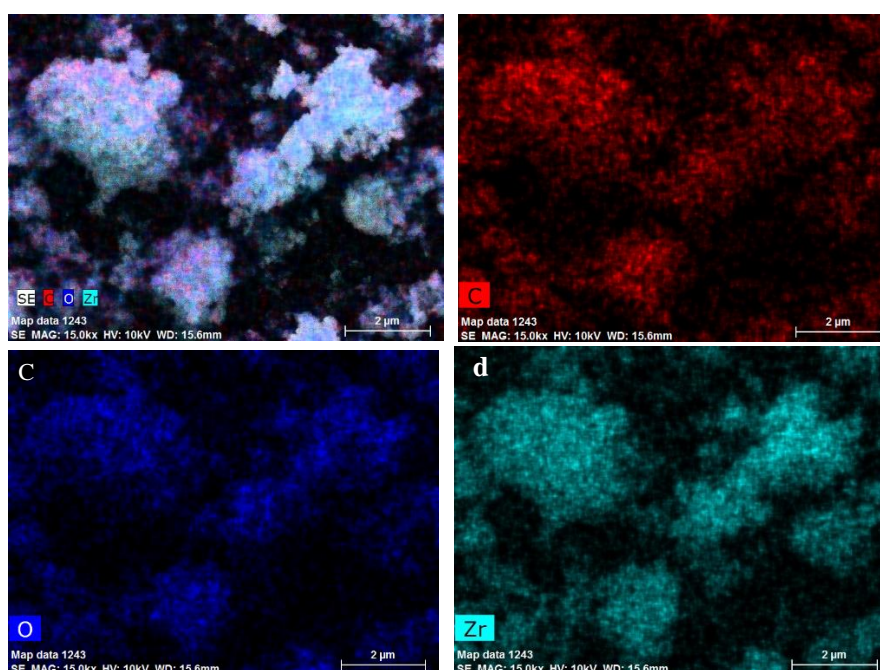

Fig. S1 EDS mapping of the distribution of C, O, Zr element in chitosan-Zr.

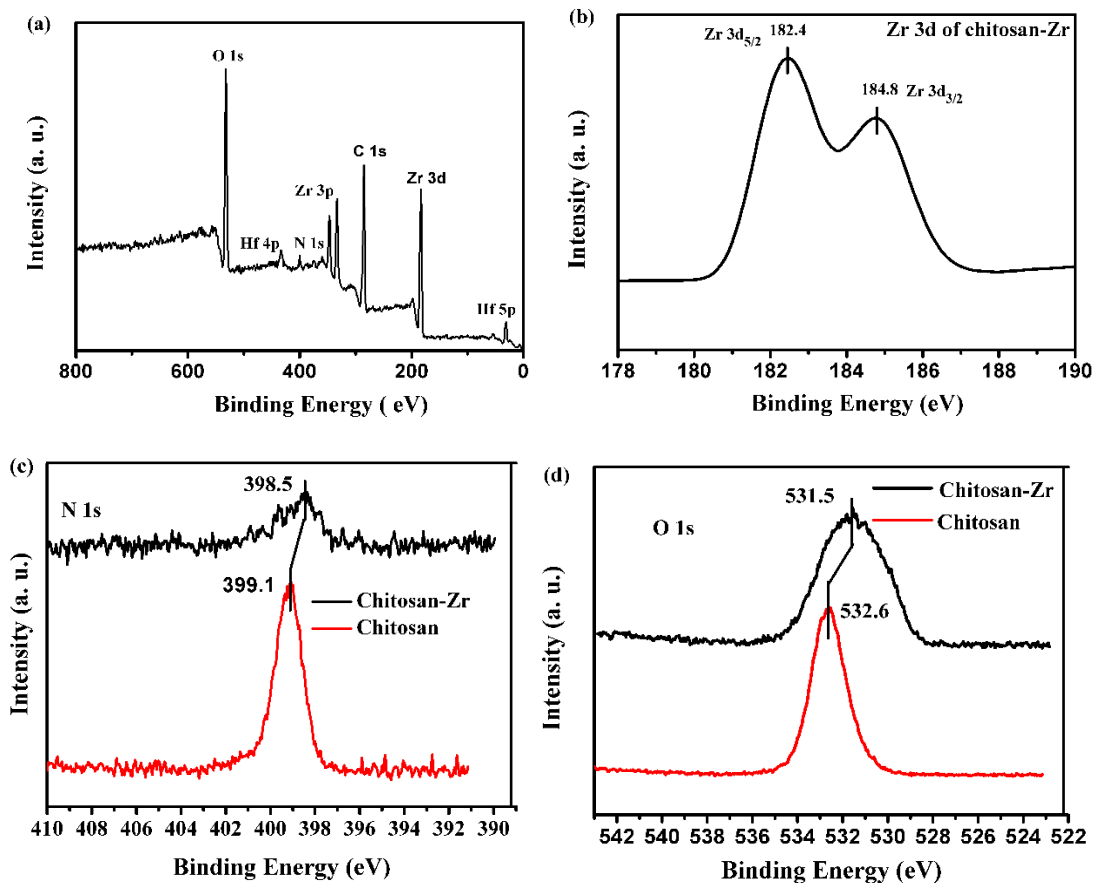

Fig. S2 XPS detection. (a) XPS survey scan. (b) Zr 3d spectrum of chitosan-Zr. (c) N 1s spectra of chitosan-Zr and chitosan. (d) O 1s spectra of chitosan-Zr and chitosan.

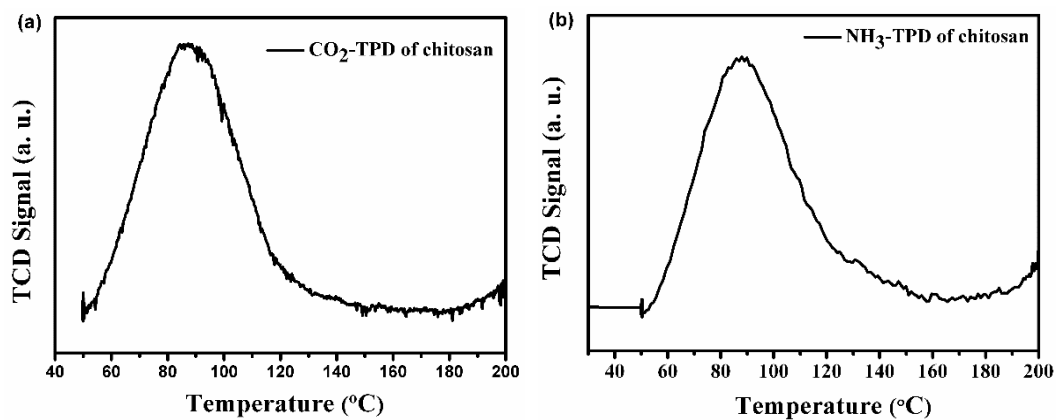

Fig. S3 CO<sub>2</sub>-TPD and NH<sub>3</sub>-TPD of chitosan.

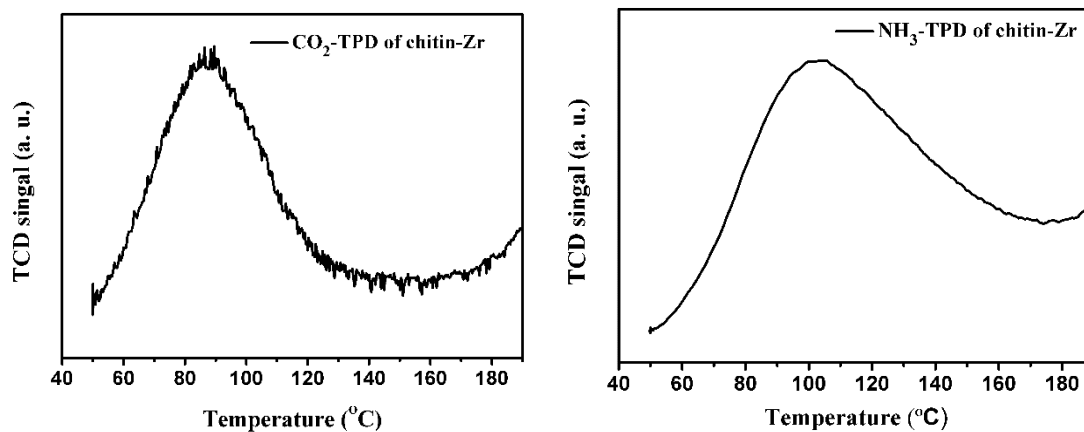

Fig. S4  $\text{CO}_2$ -TPD and  $\text{NH}_3$ -TPD of chitin-Zr.

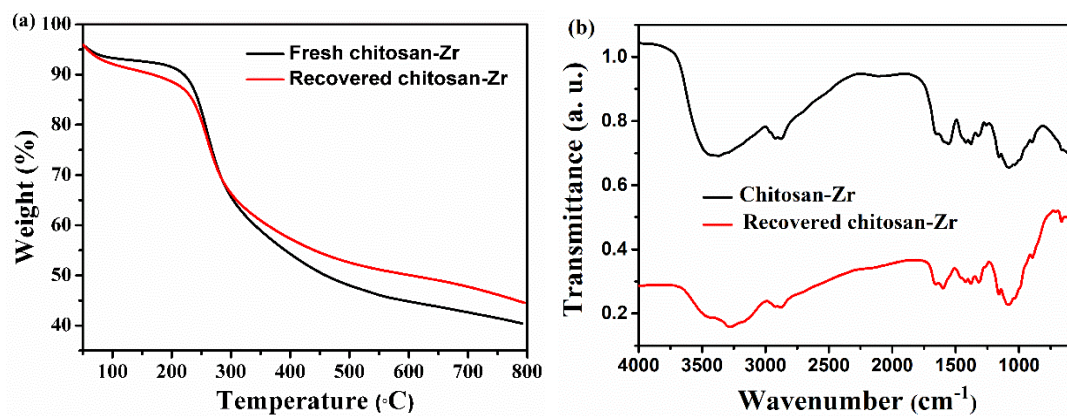

Fig. S5 (a) TG and (b) FT-IR Analysis of the fresh-prepared and recovered Zr-chitosan.

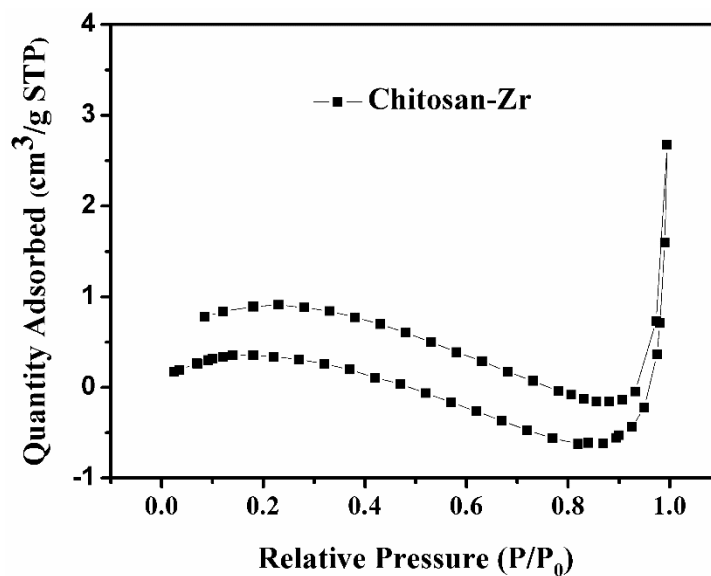

Fig. S6.  $\text{N}_2$  adsorption-desorption isotherm for chitosan-Zr.

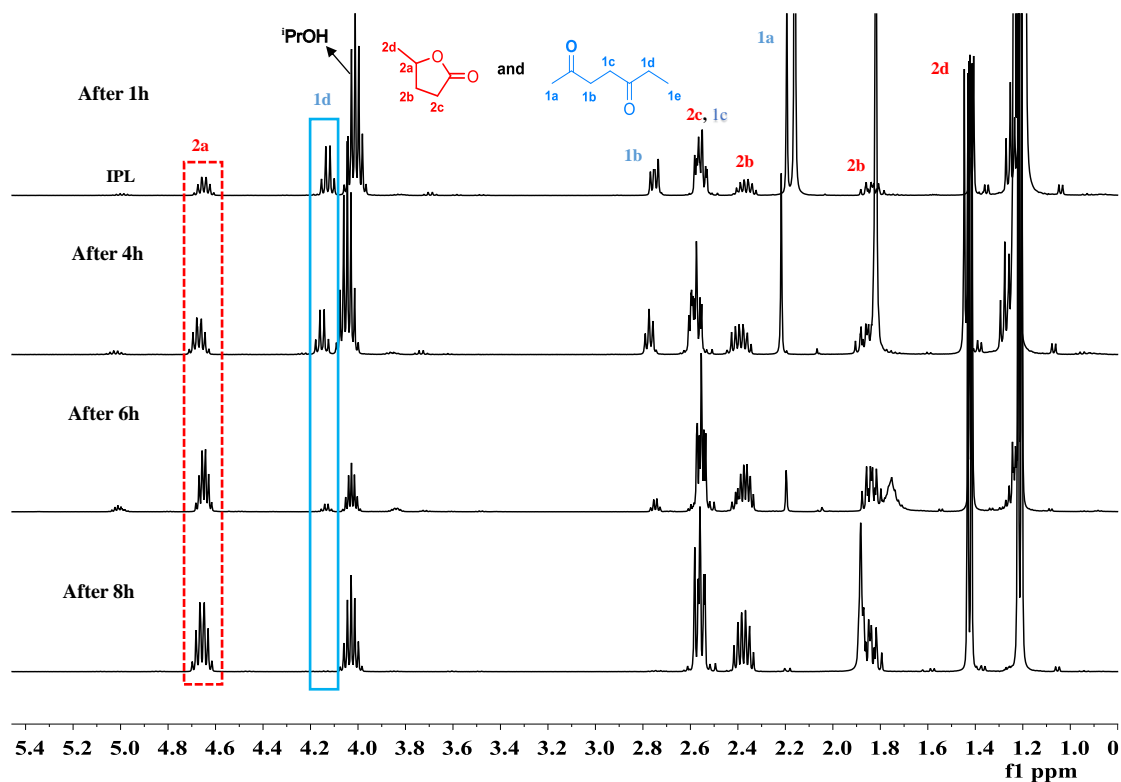

Fig. S7 Overlay of the  $^1\text{H}$  NMR spectra obtained for the reduction of EL to GVL. Conditions: 0.25 mmol EL, 15 mol% chitosan-Zr, 1 mL isopropanol, 160  $^\circ\text{C}$  ( $\text{CDCl}_3$ , 500 MHz).

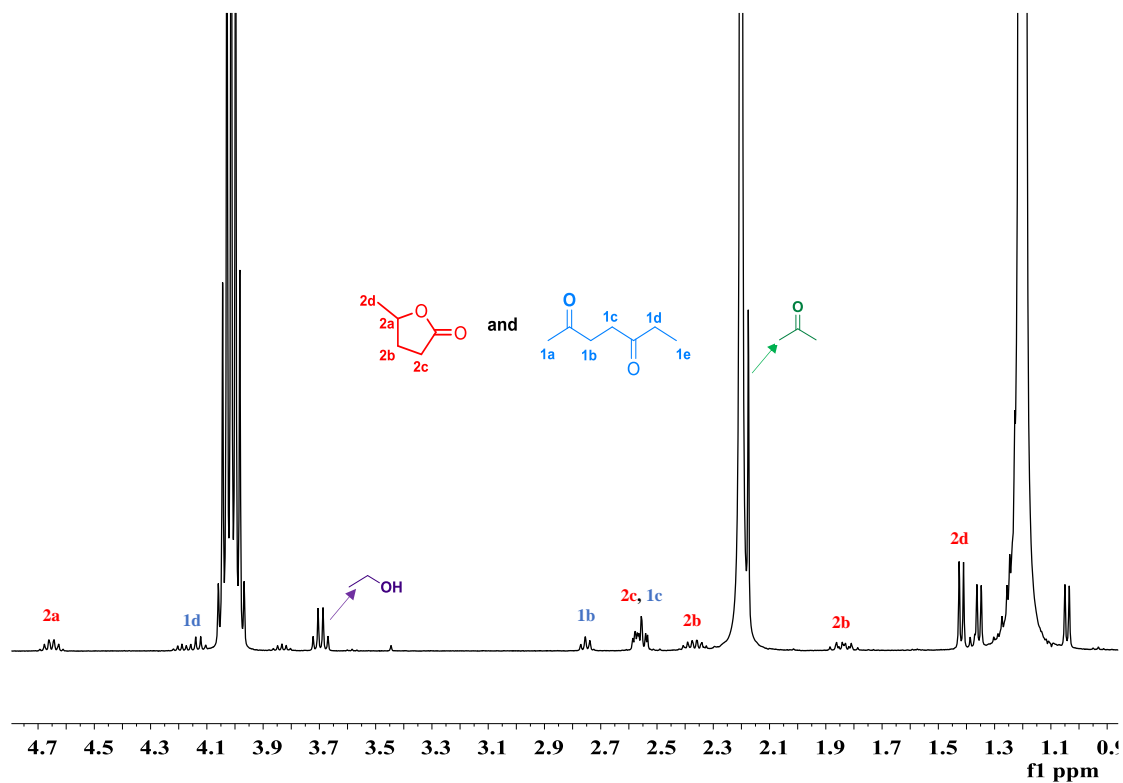

Fig. S8  $^1\text{H}$  NMR spectra for the reaction mixture of EL to GVL conversion. Conditions: 0.25 mmol EL, 15 mol% chitosan-Zr, 1 ml isopropanol, 160  $^\circ\text{C}$  and 2 h ( $\text{CDCl}_3$ , 500 MHz).
